# Supplementary material for: Discrimination between the Two Closely Related Species of the Operational Group B. amyloliquefaciens Based on Whole-Cell Fatty Acid Profiling
Source: MDPI journal article supplement (doi:10.3390/microorganisms10020418), 2022-02-11
Supplement: s1 [file s1]

## Supplementary Materials

**Table S1:** Reference *Bacillus* strains and their sequence data using in phylogeny construction

| Strain<br>number            | GenBank<br>accession<br>number | length<br>(bp) | positions<br>(bp) | length<br>(bp) | positions<br>(bp)   | Reference | Origin                                                                                                                 |
|-----------------------------|--------------------------------|----------------|-------------------|----------------|---------------------|-----------|------------------------------------------------------------------------------------------------------------------------|
|                             |                                | <i>gyrA</i>    |                   | <i>rpoB</i>    |                     |           |                                                                                                                        |
| <i>B. amyloliquefaciens</i> |                                |                |                   |                |                     |           |                                                                                                                        |
| LL3                         | NC_017190.1                    | 937            | 7107 to<br>8043   | 743            | 117089 to<br>117831 | [1]       | isolated from<br>fermented food<br>(Korean<br>bibimbap),<br>China                                                      |
| TA208                       | NC_017188.1                    | 937            | 7107 to<br>8043   | 743            | 112280 to<br>113022 | [2]       | industrial<br>production of<br>guanosine and<br>synthesis of<br>ribavirin,<br>China                                    |
| XH7                         | CP002927.1                     | 937            | 7107 to<br>8043   | 743            | 112278 to<br>113020 | [3]       | industrial<br>production of<br>purine<br>nucleoside<br>inosine, China                                                  |
| <i>B. velezensis</i>        |                                |                |                   |                |                     |           |                                                                                                                        |
| AP183                       | CP029296.1                     | 937            | 7136 to<br>8072   | 744            | 116972 to<br>117715 | [4]       | isolated from a<br>cotton plant<br>rhizosphere,<br>USA                                                                 |
| AS43.3                      | CP003838.1                     | 945            | 7099 to<br>8043   | 744            | 122589 to<br>123332 | [5]       | Not provided                                                                                                           |
| At1                         | CP041145.1                     | 948            | 7133 to<br>8080   | 743            | 122719 to<br>123461 | [6]       | isolated from<br><i>Arabidopsis<br/>thaliana</i><br>seedling from<br>surface<br>sterilized seed,<br>Uppsala,<br>Sweden |

| Strain<br>number | GenBank<br>accession<br>number | length<br>(bp) | positions<br>(bp)     | length<br>(bp) | positions<br>(bp)     | Reference | Origin                                                                                                                                       |
|------------------|--------------------------------|----------------|-----------------------|----------------|-----------------------|-----------|----------------------------------------------------------------------------------------------------------------------------------------------|
|                  |                                | <i>gyrA</i>    |                       | <i>rpoB</i>    |                       |           |                                                                                                                                              |
| BIM B-439D       | CP032144.1                     | 943            | 7097 to<br>8039       | 742            | 122917 to<br>123658   | [7]       | isolated from<br>the sample of<br>soddy, ash-<br>grey soil<br>obtained on<br>the territory of<br>the Minsk<br>region,<br>Vileyka,<br>Belarus |
| BvL03            | CP041192.1                     | 948            | 6608 to<br>7555       | 742            | 129097 to<br>129838   | [8]       | isolated from<br>the sediment<br>samples of fish<br>pond,<br>Wangcheng,<br>Changsha,<br>China                                                |
| LF01             | CP058216.1                     | 937            | 2094067 to<br>2095003 | 742            | 2209767 to<br>2210508 | [9]       | isolated from<br>tilapia,<br>Guangzhou,<br>China                                                                                             |
| QST713           | CP025079.1                     | 937            | 7100 to<br>8036       | 741            | 116750 to<br>117490   | [10]      | isolated from<br>the<br>commercial<br>product<br>Serenade<br>(Bayer),<br>France                                                              |
| S141             | AP018402.1                     | 945            | 7100 to<br>8044       | 742            | 122957 to<br>123698   | [11]      | isolated from<br>soybean<br>(Glycine max)<br>rhizosphere,<br>Thailand                                                                        |
| SGAir0473        | CP027868.1                     | 956            | 2217071 to<br>2218026 | 743            | 2333101 to<br>2333843 | [12]      | isolated from<br>tropical air,<br>Singapore                                                                                                  |

| Strain number      | GenBank accession number | length (bp) | positions (bp)     | length (bp) | positions (bp)     | Reference | Origin                                                     |
|--------------------|--------------------------|-------------|--------------------|-------------|--------------------|-----------|------------------------------------------------------------|
|                    |                          |             | <i>gyrA</i>        |             | <i>rpoB</i>        |           |                                                            |
| SQR9               | CP006890.1               | 937         | 7100 to 8036       | 742         | 117092 to 117833   | [5]       | isolated from the plant rhizosphere soil, China            |
| WRN014             | CP041361.1               | 948         | 6790 to 7737       | 742         | 122609 to 123350   | [13]      | isolated from soil of banana root in fields, Hainan, China |
| <i>B. subtilis</i> |                          |             |                    |             |                    |           |                                                            |
| ATCC 6633          | CP039755.1               | 2466        | 3779374 to 3781839 | 743         | 3894578 to 3895320 | [14]      | Japan                                                      |

## References

- Choi, J.; Nam, J.; Seo, M.-H. Complete genome sequence of *Bacillus velezensis* NST6 and comparison with the species belonging to operational group B. *amyoliquefaciens*. *Genomics* **2021**, *113*, 380–386. doi: 10.1016/j.ygeno.2020.12.011.
- Grady, E.N.; MacDonald, J.; Ho, M.T.; Weselowski, B.; McDowell, T.; Solomon, O.; Renaud, J.; Yuan, Z.C. Characterization and complete genome analysis of the surfactin-producing, plant-protecting bacterium *Bacillus velezensis* 9D-6. *BMC Microbiol.* **2019**, *19*:5, doi: 10.1186/s12866-018-1380-8.
- Fukumoto, J. Studies on the production of bacterial amylase. I. Isolation of bacteria secreting potent amylases and their distribution. *J. Agric. Chem. Soc. Japan* **1943**, *19*, 487–503, doi: 10.1271/nogeikagaku1924.19.7\_487.
- Dunlap, C.A.; Kim, S.J.; Kwon, S.W.; Rooney, A.P. *Bacillus velezensis* is not a later heterotypic synonym of *Bacillus amyoliquefaciens*; *Bacillus methylotrophicus*, *Bacillus amyoliquefaciens* subsp. *plantarum* and ‘*Bacillus oryzicola*’ are later heterotypic synonyms of *Bacillus velezensis* based on phylogenom. *Int. J. Syst. Evol. Microbiol.* **2016**, *66*, 1212–1217. doi: 10.1099/ijsem.0.000858.
- De Carvalho, C.C.C.R.; Caramujo, M.J. The various roles of fatty acids. *Molecules* **2018**, *23*:2583. doi: 10.3390/molecules23102583.
- Dunlap, C.A.; Kim, S.J.; Kwon, S.W.; Rooney, A.P. Phylogenomic analysis shows that *Bacillus amyoliquefaciens* subsp. *plantarum* is a later heterotypic synonym of *Bacillus methylotrophicus*. *Int. J. Syst. Evol. Microbiol.* **2015**, *65*, 2104–2109. doi: 10.1099/ijms.0.000226.
- Berezhnaya, A.V.; Evdokimova, O.V.; Valentovich, L.N.; Sverchkova, N.V.; Titok, M.A.; Kolomiyets, E.I. Molecular genetic and functional analysis of the genome of bacteria *Bacillus velezensis* BIM B-439D. *Appl. Biochem. Microbiol.* **2019**, *55*, 386–396. doi: 10.1134/S0003683819040033.
- Cao, L.; Pan, L.; Gong, L.; Yang, Y.; He, H.; Li, Y.; Peng, Y.; Li, D.; Yan, L.; Ding, X.; Hu, S.; Yu, Z.; Sun, Y.; Huang, W.; Hu, Y.; Yi, G.; Xia, L. Interaction of a novel *Bacillus velezensis* (BvL03) against *Aeromonas hydrophila* in vitro and in vivo in grass carp. *Appl. Microbiol. Biotechnol.* **2019**, *103*, 8987–8999. doi: 10.1007/s00253-019-10096-7.
- Geng, W.; Cao, M.; Song, C.; Xie, H.; Liu, L.; Yang, C.; Feng, J.; Zhang, W.; Jin, Y.; Du, Y.; Wang, S. Complete genome sequence of *Bacillus amyoliquefaciens* LL3, which exhibits glutamic acid-independent production of poly- $\gamma$ -glutamic acid. *J. Bacteriol.* **2011**, *193*, 3393–3394. doi: 10.1128/JB.05058-11.
- Borriß, R.; Chen, X.H.; Rueckert, C.; Blom, J.; Becker, A.; Baumgarth, B.; Fan, B.; Pukall, R.; Schumann, P.; Spröer, C.; Junge, H.; Vater, J.; Pühler, A.; Klenk, H.P. Relationship of *Bacillus amyoliquefaciens* clades associated with strains DSM 7<sup>T</sup> and FZB42<sup>T</sup>: A proposal for *Bacillus amyoliquefaciens* subsp. *amyoliquefaciens* subsp. nov. and *Bacillus amyoliquefaciens* subsp. *plantarum* subsp. nov. based on complete genome sequence comparisons. *Int. J. Syst. Evol. Microbiol.* **2011**, *61*, 1786–1801. doi: 10.1099/ijms.0.023267-0.
- Fan, B.; Blom, J.; Klenk, H.P.; Borriß, R. *Bacillus amyoliquefaciens*, *Bacillus velezensis*, and *Bacillus siamensis* form an “Operational Group B. *amyoliquefaciens*” within the *B. subtilis* species complex. *Front. Microbiol.* **2017**, *8*:22. doi: 10.3389/fmicb.2017.00022.

12. da Costa, M.S.; Albuquerque, L.; Nobre, M.F.; Wait, R. The identification of fatty acids in bacteria. *Meth. Microbiol.* **2011**, *38*, 183–196.
13. Fan, B.; Wang, C.; Song, X.; Ding, X.; Wu, L.; Wu, H.; Gao, X.; Borriss, R. *Bacillus velezensis* FZB42 in 2018: The Gram-positive model strain for plant growth promotion and biocontrol. *Front. Microbiol.* **2018**, *9*, 2491, doi: 10.3389/fmicb.2018.02491.
14. Diomandé, S.E.; Nguyen-The, C.; Guinebretière, M.H.; Broussolle, V.; Brillard, J. Role of fatty acids in *Bacillus* environmental adaptation. *Front. Microbiol.* **2015**, *6*:813. doi: 10.3389/fmicb.2015.00813.

**Table S2.** Parameters of the whole-cell FA features of *B. velezensis*

| Name of<br>FA       | Count<br>of<br>samples | Mean of<br>FA content<br>(%) | SD   | SD /<br>Mean | Minimum<br>FA content<br>(%) | Maximum<br>FA content<br>(%) | Usage |
|---------------------|------------------------|------------------------------|------|--------------|------------------------------|------------------------------|-------|
| 9:0                 | 3                      | 0.06                         | 0.23 | 4.15         | 0.00                         | 1.17                         | no    |
| 10:0 iso            | 2                      | 0.01                         | 0.06 | 5.15         | 0.00                         | 0.39                         | no    |
| 10:0                | 4                      | 0.03                         | 0.13 | 3.69         | 0.00                         | 0.69                         | no    |
| 11:0 anteiso        | 1                      | 0.02                         | 0.14 | 6.93         | 0.00                         | 0.99                         | no    |
| 12:0                | 45                     | 0.48                         | 0.23 | 0.48         | 0.00                         | 1.17                         | yes   |
| 13:0 iso            | 47                     | 0.89                         | 0.22 | 0.25         | 0.00                         | 1.44                         | yes   |
| 13:0                | 3                      | 0.01                         | 0.06 | 4.64         | 0.00                         | 0.39                         | no    |
| 14:0 iso            | 47                     | 1.18                         | 0.58 | 0.50         | 0.00                         | 2.31                         | yes   |
| 14:0                | 48                     | 2.87                         | 0.70 | 0.24         | 1.69                         | 4.89                         | yes   |
| 15:0 iso            | 48                     | 30.39                        | 2.53 | 0.08         | 25.63                        | 35.87                        | yes   |
| 15:0 anteiso        | 48                     | 32.13                        | 2.33 | 0.07         | 27.20                        | 36.42                        | yes   |
| 16:1 w7c<br>alcohol | 10                     | 0.04                         | 0.09 | 2.11         | 0.00                         | 0.34                         | no    |
| 16:0 iso            | 48                     | 1.70                         | 0.77 | 0.45         | 0.67                         | 3.09                         | yes   |
| 16:1 w11c           | 48                     | 1.65                         | 0.42 | 0.25         | 1.12                         | 2.70                         | yes   |
| 16:0                | 48                     | 12.53                        | 1.82 | 0.15         | 8.90                         | 17.49                        | yes   |
| 15:0 2OH            | 1                      | 0.00                         | 0.03 | 6.93         | 0.00                         | 0.20                         | no    |
| 17:1 iso<br>w10c    | 45                     | 0.85                         | 0.47 | 0.55         | 0.00                         | 2.03                         | yes   |
| 17:0 iso            | 48                     | 8.52                         | 0.96 | 0.11         | 6.37                         | 10.47                        | yes   |
| 17:0 anteiso        | 48                     | 5.50                         | 0.85 | 0.16         | 3.91                         | 7.54                         | yes   |
| 17:0                | 26                     | 0.17                         | 0.18 | 1.06         | 0.00                         | 0.69                         | no    |
| 16:0 iso<br>3OH     | 1                      | 0.00                         | 0.03 | 6.93         | 0.00                         | 0.20                         | no    |

| Name of FA        | Count of samples | Mean of FA content (%) | SD   | SD / Mean | Minimum FA content (%) | Maximum FA content (%) | Usage |
|-------------------|------------------|------------------------|------|-----------|------------------------|------------------------|-------|
| 18:3 w6c (6,9,12) | 5                | 0.03                   | 0.08 | 3.08      | 0.00                   | 0.32                   | no    |
| 18:1 w9c          | 10               | 0.08                   | 0.20 | 2.68      | 0.00                   | 0.99                   | no    |
| 18:0              | 48               | 0.60                   | 0.14 | 0.24      | 0.36                   | 1.06                   | yes   |
| 19:0 iso          | 4                | 0.02                   | 0.07 | 3.76      | 0.00                   | 0.37                   | no    |
| 19:0 anteiso      | 2                | 0.01                   | 0.06 | 4.86      | 0.00                   | 0.29                   | no    |
| 19:0 cyclo w8c    | 1                | 0.00                   | 0.02 | 6.93      | 0.00                   | 0.13                   | no    |
| 18:1 2OH          | 1                | 0.00                   | 0.03 | 6.93      | 0.00                   | 0.23                   | no    |
| 18:0 3OH          | 2                | 0.01                   | 0.07 | 4.86      | 0.00                   | 0.36                   | no    |
| 20:0 iso          | 1                | 0.00                   | 0.02 | 6.93      | 0.00                   | 0.13                   | no    |
| 20:0              | 3                | 0.02                   | 0.10 | 4.27      | 0.00                   | 0.54                   | no    |
| PC1               |                  | -0.13                  | 3.33 |           |                        |                        |       |
| PC2               |                  | -11.37                 | 2.26 |           |                        |                        |       |
| PC3               |                  | 32.48                  | 1.10 |           |                        |                        |       |
| PC4               |                  | -4.76                  | 0.89 |           |                        |                        |       |

**Table S3.** Parameters of the whole-cell FA features of *B. amyloliquefaciens*

| Name of FA   | Count of samples | Mean of FA content (%) | SD   | SD / Mean | Minimum FA content (%) | Maximum FA content (%) | Usage |
|--------------|------------------|------------------------|------|-----------|------------------------|------------------------|-------|
| 9:0          | 1                | 0.01                   | 0.07 | 7.07      | 0.00                   | 0.49                   | no    |
| 10:0 iso     | 4                | 0.06                   | 0.21 | 3.57      | 0.00                   | 1.04                   | no    |
| 10:0         | 6                | 0.09                   | 0.27 | 2.88      | 0.00                   | 1.22                   | no    |
| 9:0 3OH      | 1                | 0.01                   | 0.10 | 7.07      | 0.00                   | 0.70                   | no    |
| 11:0 anteiso | 21               | 0.24                   | 0.33 | 1.37      | 0.00                   | 1.17                   | no    |
| 11:0         | 2                | 0.01                   | 0.07 | 4.96      | 0.00                   | 0.39                   | no    |
| 12:0         | 50               | 0.54                   | 0.17 | 0.31      | 0.25                   | 1.14                   | yes   |
| 11:0 2OH     | 1                | 0.02                   | 0.11 | 7.07      | 0.00                   | 0.76                   | no    |

| Name of FA       | Count of samples | Mean of FA content (%) | SD   | SD / Mean | Minimum FA content (%) | Maximum FA content (%) | Usage |
|------------------|------------------|------------------------|------|-----------|------------------------|------------------------|-------|
| 11:0 3OH         | 1                | 0.01                   | 0.05 | 7.07      | 0.00                   | 0.33                   | no    |
| 13:0 iso         | 46               | 0.50                   | 0.19 | 0.37      | 0.00                   | 1.01                   | yes   |
| 13:0             | 1                | 0.01                   | 0.05 | 7.07      | 0.00                   | 0.37                   | no    |
| 12:0 iso 3OH     | 1                | 0.01                   | 0.04 | 7.07      | 0.00                   | 0.29                   | no    |
| 12:1 3OH         | 2                | 0.01                   | 0.05 | 4.95      | 0.00                   | 0.27                   | no    |
| 14:0 iso         | 50               | 1.44                   | 0.11 | 0.08      | 1.20                   | 1.84                   | yes   |
| 14:0             | 50               | 0.61                   | 0.14 | 0.23      | 0.44                   | 1.02                   | yes   |
| 15:1 iso F       | 2                | 0.02                   | 0.08 | 5.00      | 0.00                   | 0.45                   | no    |
| 15:0 iso         | 50               | 27.84                  | 1.65 | 0.06      | 24.12                  | 31.09                  | yes   |
| 15:0 anteiso     | 50               | 31.92                  | 1.98 | 0.06      | 27.76                  | 35.16                  | yes   |
| 16:1 w7c alcohol | 26               | 0.16                   | 0.17 | 1.04      | 0.00                   | 0.48                   | no    |
| 16:0 iso         | 50               | 3.51                   | 0.19 | 0.05      | 3.02                   | 3.94                   | yes   |
| 16:1 w11c        | 50               | 1.09                   | 0.28 | 0.25      | 0.70                   | 1.98                   | yes   |
| 16:0             | 50               | 4.57                   | 0.55 | 0.12      | 3.14                   | 5.99                   | yes   |
| 15:0 iso 3OH     | 1                | 0.00                   | 0.02 | 7.07      | 0.00                   | 0.17                   | no    |
| 15:0 2OH         | 2                | 0.01                   | 0.06 | 5.00      | 0.00                   | 0.34                   | no    |
| 17:1 iso w10c    | 50               | 1.07                   | 0.37 | 0.35      | 0.71                   | 2.31                   | yes   |
| 17:0 iso         | 50               | 15.92                  | 1.96 | 0.12      | 13.38                  | 19.03                  | yes   |
| 17:0 anteiso     | 50               | 8.99                   | 0.73 | 0.08      | 7.65                   | 12.65                  | yes   |
| 17:0             | 24               | 0.22                   | 0.25 | 1.14      | 0.00                   | 0.75                   | no    |
| 18:0 iso         | 16               | 0.10                   | 0.15 | 1.56      | 0.00                   | 0.50                   | no    |
| 18:1 w9c         | 11               | 0.10                   | 0.23 | 2.37      | 0.00                   | 0.95                   | no    |
| 18:0             | 49               | 0.59                   | 0.23 | 0.38      | 0.00                   | 1.17                   | yes   |
| 17:0 iso 3OH     | 1                | 0.01                   | 0.04 | 7.07      | 0.00                   | 0.26                   | no    |
| 19:0 iso         | 15               | 0.08                   | 0.13 | 1.58      | 0.00                   | 0.37                   | no    |
| 19:0 anteiso     | 3                | 0.02                   | 0.09 | 4.24      | 0.00                   | 0.48                   | no    |
| 19:0 cyclo w8c   | 3                | 0.02                   | 0.08 | 4.13      | 0.00                   | 0.44                   | no    |

| Name of FA | Count of samples | Mean of FA content (%) | SD   | SD / Mean | Minimum FA content (%) | Maximum FA content (%) | Usage |
|------------|------------------|------------------------|------|-----------|------------------------|------------------------|-------|
| 18:1 2OH   | 1                | 0.00                   | 0.03 | 7.07      | 0.00                   | 0.21                   | no    |
| 18:0 2OH   | 1                | 0.01                   | 0.04 | 7.07      | 0.00                   | 0.30                   | no    |
| 20:1 w7c   | 1                | 0.00                   | 0.03 | 7.07      | 0.00                   | 0.23                   | no    |
| PC1        |                  | 20.79                  | 2.82 |           |                        |                        | --    |
| PC2        |                  | 15.08                  | 1.50 |           |                        |                        | --    |
| PC3        |                  | 23.92                  | 0.98 |           |                        |                        | --    |

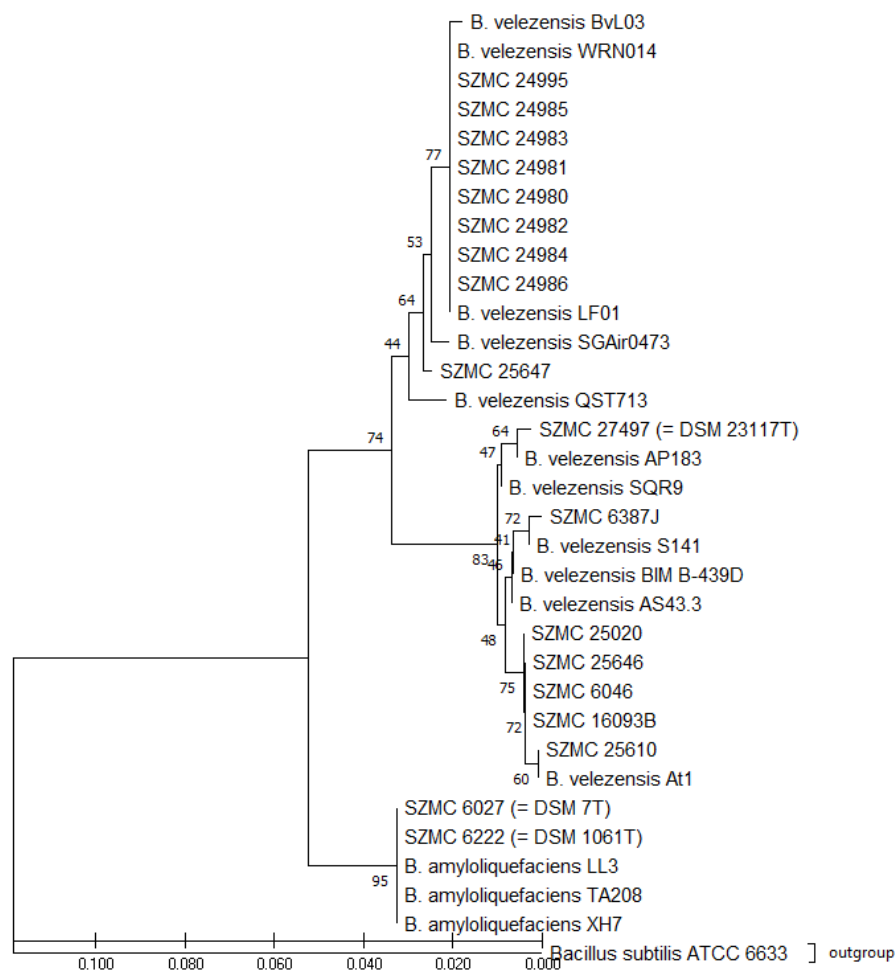

**Figure S1.** Neighbour-Joining phylogenetic tree based on *gyrA* gene sequences. Evolutionary distances were computed by the Tamura-Nei method. Bars, 0.020 substitutions per nucleotide position.

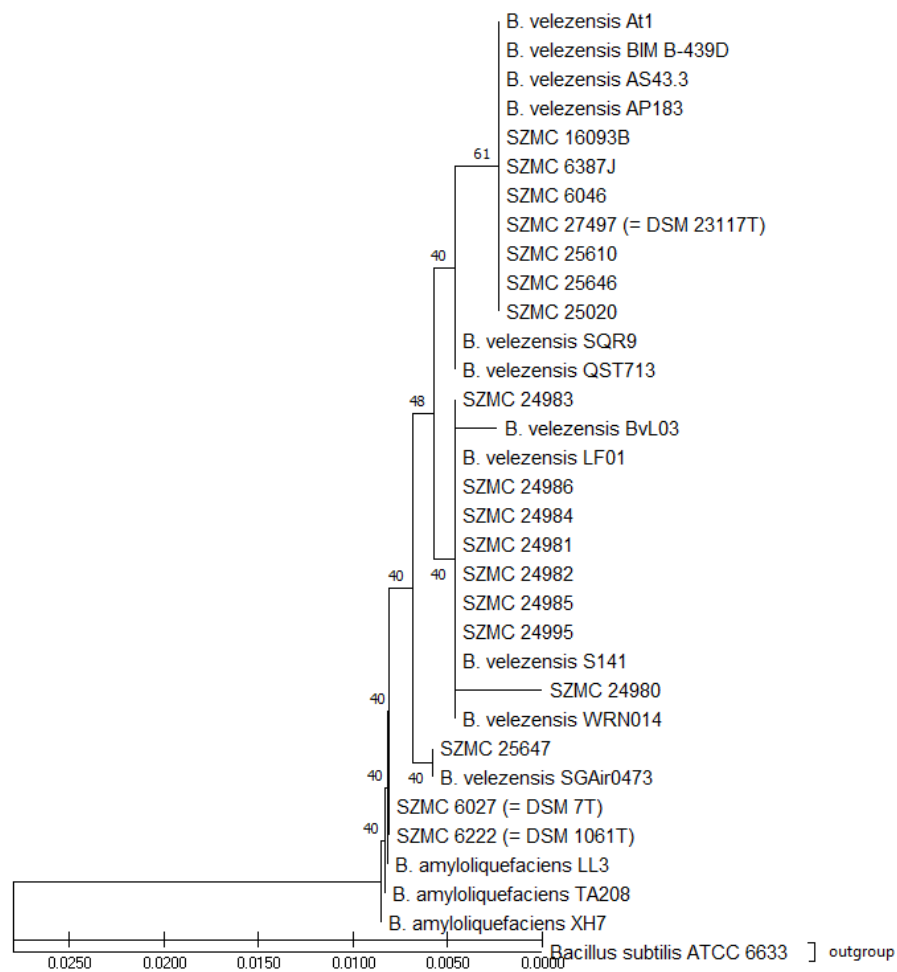

**Figure S2.** Neighbour-Joining phylogenetic tree based on *rpoB* gene sequences. Evolutionary distances were computed by the Tamura-Nei method. Bars, 0.0050 substitutions per nucleotide position.



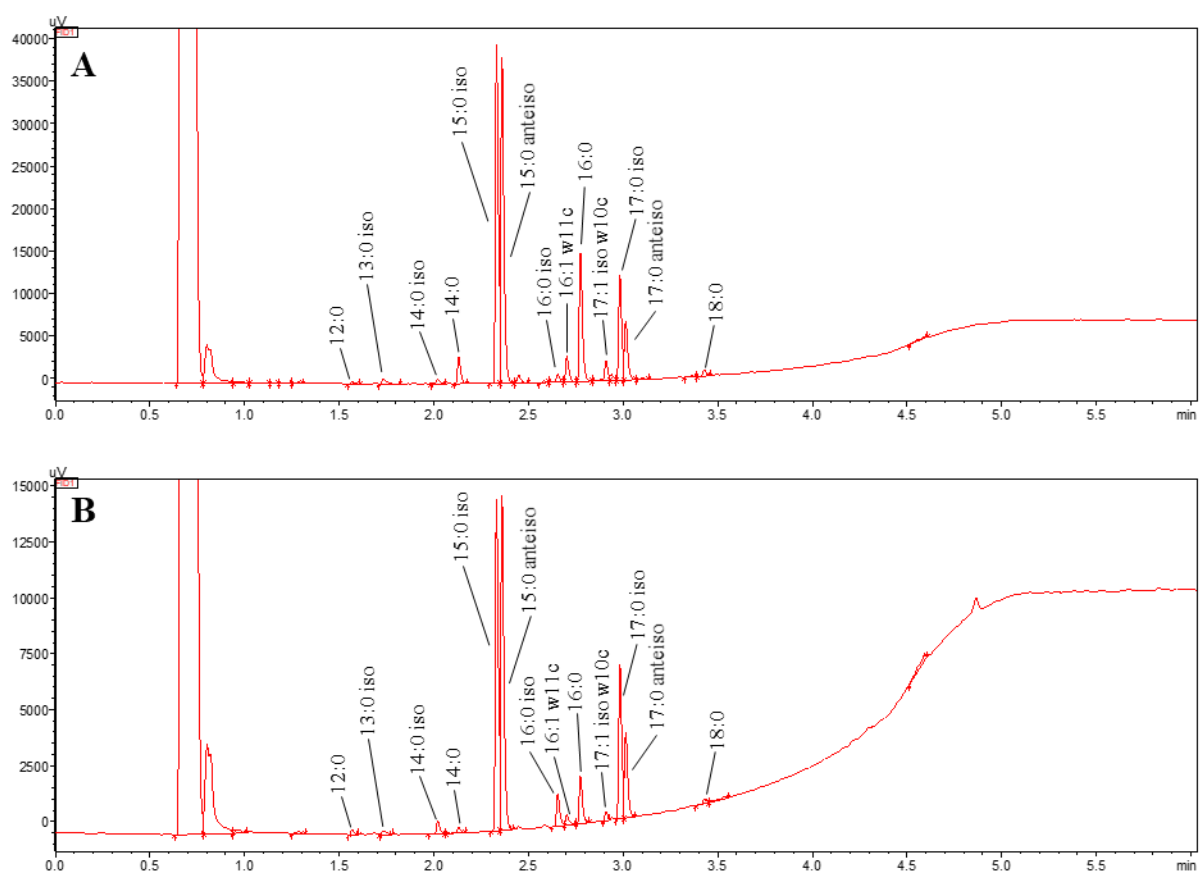

**Figure S3.** Chromatograms of the FAs of *B. velezensis* (A) and *B. amyloliquefaciens* (B).
